# Supplementary material
Source: PubMed Central journal article supplement (PMC7431148)
Supplement: jbjsam-102-e78-s002.pdf [file jbjsam-102-e78-s002.pdf]

**The following content was supplied by the authors as supporting material and has not been copy-edited or verified by JBJS.**

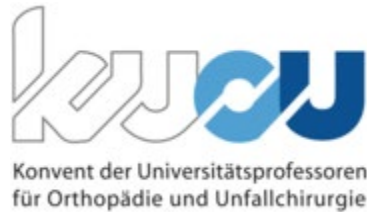

*A survey by the convent of University Professors of Orthopaedic and Trauma surgery in Germany*

**To evaluate the impact of the COVID-19 pandemic on orthopaedic and trauma surgery in university hospitals in Germany**

| <b>A) Government</b>                                                                                               | <b>Totally agree</b> | <b>Rather agree</b> | <b>Neutral</b> | <b>Rather disagree</b> | <b>Totally disagree</b> |
|--------------------------------------------------------------------------------------------------------------------|----------------------|---------------------|----------------|------------------------|-------------------------|
| 1. Did you perceive the communication of information by the government at different points in time as appropriate? |                      |                     |                |                        |                         |
| 2. Have you assessed the political measures taken as adequate?                                                     |                      |                     |                |                        |                         |
| 3. Did you perceive the postponement of elective operations as an adequate measure?                                |                      |                     |                |                        |                         |
| 4. Would you have preferred more commitments for financial support/coverage?                                       |                      |                     |                |                        |                         |
| 5. Despite the pandemic the work of our department has been perceived as important.                                |                      |                     |                |                        |                         |

| <b>B) Health Authorities (Robert Koch-institute, public health department, Paul-Ehrlich-institute)</b>                                       | <b>Totally agree</b> | <b>Rather agree</b> | <b>Neutral</b> | <b>Rather disagree</b> | <b>Totally disagree</b> |
|----------------------------------------------------------------------------------------------------------------------------------------------|----------------------|---------------------|----------------|------------------------|-------------------------|
| 6. Communication of information by the authorities was adequate.                                                                             |                      |                     |                |                        |                         |
| 7. The authorities were competent counterparts.                                                                                              |                      |                     |                |                        |                         |
| 8. The authorities enacted adequate measures for the protection of healthcare workers (e.g. protection in the emergency department/OR/ward). |                      |                     |                |                        |                         |
| 9. The authorities were perceived as supporters of our department.                                                                           |                      |                     |                |                        |                         |

| <b>C) Hospital administration</b>                                                                                              | <b>Totally agree</b> | <b>Rather agree</b> | <b>Neutral</b> | <b>Rather disagree</b> | <b>Totally disagree</b> |
|--------------------------------------------------------------------------------------------------------------------------------|----------------------|---------------------|----------------|------------------------|-------------------------|
| 10. Communication with the hospital administration was adequate.                                                               |                      |                     |                |                        |                         |
| 11. The hospital administration explicitly communicated that financial targets are second-tier in the current situation.       |                      |                     |                |                        |                         |
| 12. The hospital administration actively regulated personnel distribution.                                                     |                      |                     |                |                        |                         |
| 13. There was financial compensation for the reallocation of staff from other departments (e.g.: anaesthesia/ intensive care). |                      |                     |                |                        |                         |
| 14. The hospital administration ensured sufficient protection of their employees (e.g. SOPs, providing protective equipment).  |                      |                     |                |                        |                         |
| 15. The hospital administration was perceived as a supporter of the orthopaedic and trauma surgery department.                 |                      |                     |                |                        |                         |
| 16. The orthopaedic and/or trauma surgery departments were actively included in crisis management.                             |                      |                     |                |                        |                         |
| 17. The orthopaedic and/or trauma surgery departments were included in the following crisis management groups:                 | <i>(free text)</i>   |                     |                |                        |                         |

| <b>D) Other departments</b>                                                          | <b>Totally agree</b> | <b>Rather agree</b> | <b>Neutral</b> | <b>Rather disagree</b> | <b>Totally disagree</b> |
|--------------------------------------------------------------------------------------|----------------------|---------------------|----------------|------------------------|-------------------------|
| 18. Communication with anesthesiologists and intensive care physicians was adequate. |                      |                     |                |                        |                         |
| 19. Communication with infectiologists was adequate.                                 |                      |                     |                |                        |                         |

| E) Restructuring/Consequences of the pandemic                                                         | Capacity reduction in % | Reduction of capacity utilisation in % |
|-------------------------------------------------------------------------------------------------------|-------------------------|----------------------------------------|
| 20. Estimate the capacity and its utilisation of <u>patient beds</u> in your department.              |                         |                                        |
| 21. Estimate the capacity and its utilisation of <u>operating rooms</u> in your department.           |                         |                                        |
| 22. Estimate the capacity and its utilisation of the <u>outpatient department</u> in your department. |                         |                                        |
| 23. Estimate the fraction of doctors who were reallocated to other departments.                       |                         |                                        |
| 24. Which departments were those doctors allocated to?                                                | <i>(free text)</i>      |                                        |
| 25. Estimate the fraction of doctors of your department with reduced working-hours.                   |                         |                                        |
| 26. Estimate the fraction of doctors of your department who have been infected by SARS-CoV-2.         |                         |                                        |
| 27. Estimate the fraction of doctors of your department who are/were in home quarantine.              |                         |                                        |

| E) Restructuring/Consequences of the pandemic                                                                                                 | Yes | No |
|-----------------------------------------------------------------------------------------------------------------------------------------------|-----|----|
| 28. Reduction of overtime hours was ordered.                                                                                                  |     |    |
| 29. Vacation was ordered.                                                                                                                     |     |    |
| 30. The wage agreement's legal requirements were met in doing so.                                                                             |     |    |
| 31. Sufficient adequate protective equipment was provided for your employees.                                                                 |     |    |
| 32. Emergency surgeries (at least N4 classified) had to be postponed due to sick leaves of employees.                                         |     |    |
| 33. At this point, would you consider that not achieving your financial target settings will have financial consequences for your department? |     |    |
| 34. At this point, would you consider that not achieving your financial target settings will have consequences for your department's staff?   |     |    |

| <b>E) Financial Impact</b> |  | <b>Please estimate the loss regarding your financial target settings in the following aspects (in %) at this point.</b> |
|----------------------------|--|-------------------------------------------------------------------------------------------------------------------------|
| <b>35. Case Mix Points</b> |  |                                                                                                                         |
| <b>36. Revenue</b>         |  |                                                                                                                         |

| <b>F) Future prospects</b>                                                                   | <b>Totally agree</b> | <b>Rather agree</b> | <b>Neutral</b> | <b>Rather disagree</b> | <b>Totally disagree</b> |
|----------------------------------------------------------------------------------------------|----------------------|---------------------|----------------|------------------------|-------------------------|
| <b>37. The number of elective surgeries (e.g. arthroplasty) will decrease in the future.</b> |                      |                     |                |                        |                         |
| <b>38. Your department will have lost significance in the future.</b>                        |                      |                     |                |                        |                         |
| <b>39. Overall, your department will be weakened by the SARS-CoV-2 pandemic.</b>             |                      |                     |                |                        |                         |

| <b>G) Affiliation</b>                                          | <b>Orthopaedics</b> | <b>Orthopaedic and trauma surgery</b> | <b>Trauma surgery</b> |
|----------------------------------------------------------------|---------------------|---------------------------------------|-----------------------|
| <b>40. Participant in leading function of the</b>              |                     |                                       |                       |
| <b>F) The following field is provided for further comments</b> |                     |                                       |                       |
| <b>41. (free text)</b>                                         |                     |                                       |                       |

**Impact of the COVID-19 pandemic on orthopaedic and trauma surgery in university hospitals in Germany**

Total score is calculated from the sum of the Likert scale values, where "totally agree" is equal to 5, "rather agree" to 4, "neutral" to 3, "rather disagree" to 2, "totally disagree" to 1

Q1. Did you perceive the communication of information by the government at different points in time as appropriate?

| Answer Choices   | Responses | Example |           |                    |             |            |
|------------------|-----------|---------|-----------|--------------------|-------------|------------|
| totally agree    | 13,46%    | 7       | 7*5       |                    |             |            |
| rather agree     | 51,92%    | 27      | 27*4      |                    |             |            |
| neutral          | 11,54%    | 6       | 6*3       |                    |             |            |
| rather disagree  | 19,23%    | 10      | 10*2      |                    |             |            |
| totally disagree | 3,85%     | 2       | 2*1       |                    |             |            |
| <b>Answered</b>  |           |         | <b>52</b> | <b>total score</b> | <b>mean</b> | <b>SD</b>  |
| <b>Skipped</b>   |           |         | <b>0</b>  | <b>183</b>         | <b>3,5</b>  | <b>1,1</b> |

Q2. Have you assessed the political measures taken as adequate?

| Answer Choices   | Responses |    |           |                    |             |            |
|------------------|-----------|----|-----------|--------------------|-------------|------------|
| totally agree    | 23,08%    | 12 |           |                    |             |            |
| rather agree     | 48,08%    | 25 |           |                    |             |            |
| neutral          | 11,54%    | 6  |           |                    |             |            |
| rather disagree  | 11,54%    | 6  |           |                    |             |            |
| totally disagree | 5,77%     | 3  |           |                    |             |            |
| <b>Answered</b>  |           |    | <b>52</b> | <b>total score</b> | <b>mean</b> | <b>SD</b>  |
| <b>Skipped</b>   |           |    | <b>0</b>  | <b>193</b>         | <b>3,7</b>  | <b>1,1</b> |

Q3. Did you perceive the postponement of all elective operations as an adequate measure?

| Answer Choices   | Responses |    |           |                    |             |            |
|------------------|-----------|----|-----------|--------------------|-------------|------------|
| totally agree    | 9,62%     | 5  |           |                    |             |            |
| rather agree     | 36,54%    | 19 |           |                    |             |            |
| neutral          | 15,38%    | 8  |           |                    |             |            |
| rather disagree  | 32,69%    | 17 |           |                    |             |            |
| totally disagree | 5,77%     | 3  |           |                    |             |            |
| <b>Answered</b>  |           |    | <b>52</b> | <b>total score</b> | <b>mean</b> | <b>SD</b>  |
| <b>Skipped</b>   |           |    | <b>0</b>  | <b>162</b>         | <b>3,1</b>  | <b>1,1</b> |

Q4. Would you have preferred more commitments for financial support/ coverage?

| Answer Choices   | Responses |    |           |                    |             |           |
|------------------|-----------|----|-----------|--------------------|-------------|-----------|
| totally agree    | 38,46%    | 20 |           |                    |             |           |
| rather agree     | 30,77%    | 16 |           |                    |             |           |
| neutral          | 25,00%    | 13 |           |                    |             |           |
| rather disagree  | 1,92%     | 1  |           |                    |             |           |
| totally disagree | 3,85%     | 2  |           |                    |             |           |
| <b>Answered</b>  |           |    | <b>52</b> | <b>total score</b> | <b>mean</b> | <b>SD</b> |
| <b>Skipped</b>   |           |    | <b>0</b>  | <b>207</b>         | <b>4</b>    | <b>1</b>  |

Q5. Despite the pandemic the work of our department has been perceived as important.

| Answer Choices | Responses |    |
|----------------|-----------|----|
| totally agree  | 25,00%    | 13 |
| rather agree   | 21,15%    | 11 |
| neutral        | 30,77%    | 16 |

|                  |                 |           |             |      |     |
|------------------|-----------------|-----------|-------------|------|-----|
| rather disagree  | 15,38%          | 8         |             |      |     |
| totally disagree | 7,69%           | 4         | total score | mean | SD  |
|                  | <b>Answered</b> | <b>52</b> | 177         | 3,4  | 1,2 |
|                  | <b>Skipped</b>  | <b>0</b>  |             |      |     |

Q6. Communication of information by the authorities was adequate.

| Answer Choices   | Responses       |           |             |      |     |
|------------------|-----------------|-----------|-------------|------|-----|
| totally agree    | 13,73%          | 7         |             |      |     |
| rather agree     | 47,06%          | 24        |             |      |     |
| neutral          | 17,65%          | 9         |             |      |     |
| rather disagree  | 17,65%          | 9         |             |      |     |
| totally disagree | 3,92%           | 2         | total score | mean | SD  |
|                  | <b>Answered</b> | <b>51</b> | 178         | 3,5  | 1,1 |
|                  | <b>Skipped</b>  | <b>1</b>  |             |      |     |

Q7. The authorities were competent counterparts.

| Answer Choices   | Responses       |           |             |      |    |
|------------------|-----------------|-----------|-------------|------|----|
| totally agree    | 13,73%          | 7         |             |      |    |
| rather agree     | 23,53%          | 12        |             |      |    |
| neutral          | 41,18%          | 21        |             |      |    |
| rather disagree  | 15,69%          | 8         |             |      |    |
| totally disagree | 5,88%           | 3         | total score | mean | SD |
|                  | <b>Answered</b> | <b>51</b> | 165         | 3,2  | 1  |
|                  | <b>Skipped</b>  | <b>1</b>  |             |      |    |

Q8. The authorities enacted adequate measures for the protection of healthcare workers.

| Answer Choices   | Responses       |           |             |      |     |
|------------------|-----------------|-----------|-------------|------|-----|
| totally agree    | 5,88%           | 3         |             |      |     |
| rather agree     | 21,57%          | 11        |             |      |     |
| neutral          | 17,65%          | 9         |             |      |     |
| rather disagree  | 43,14%          | 22        |             |      |     |
| totally disagree | 11,76%          | 6         | total score | mean | SD  |
|                  | <b>Answered</b> | <b>51</b> | 136         | 2,7  | 1,1 |
|                  | <b>Skipped</b>  | <b>1</b>  |             |      |     |

Q9. The authorities were perceived as supporters of our department.

| Answer Choices   | Responses       |           |             |      |     |
|------------------|-----------------|-----------|-------------|------|-----|
| totally agree    | 3,92%           | 2         |             |      |     |
| rather agree     | 9,80%           | 5         |             |      |     |
| neutral          | 33,33%          | 17        |             |      |     |
| rather disagree  | 39,22%          | 20        |             |      |     |
| totally disagree | 13,73%          | 7         | total score | mean | SD  |
|                  | <b>Answered</b> | <b>51</b> | 128         | 2,5  | 0,9 |
|                  | <b>Skipped</b>  | <b>1</b>  |             |      |     |

Q10. Communication with the hospital administration was adequate.

| Answer Choices   | Responses       |           |             |      |     |
|------------------|-----------------|-----------|-------------|------|-----|
| totally agree    | 46,00%          | 23        |             |      |     |
| rather agree     | 30,00%          | 15        |             |      |     |
| neutral          | 10,00%          | 5         |             |      |     |
| rather disagree  | 10,00%          | 5         |             |      |     |
| totally disagree | 4,00%           | 2         | total score | mean | SD  |
|                  | <b>Answered</b> | <b>50</b> | 202         | 4    | 1,2 |
|                  | <b>Skipped</b>  | <b>2</b>  |             |      |     |

Q11. The hospital administration explicitly communicated that financial targets are second-tier in the current situation.

| Answer Choices   | Responses       |           |             |      |     |
|------------------|-----------------|-----------|-------------|------|-----|
| totally agree    | 42,00%          | 21        |             |      |     |
| rather agree     | 28,00%          | 14        |             |      |     |
| neutral          | 12,00%          | 6         |             |      |     |
| rather disagree  | 12,00%          | 6         |             |      |     |
| totally disagree | 6,00%           | 3         | total score | mean | SD  |
|                  | <b>Answered</b> | <b>50</b> | 194         | 3,9  | 1,3 |
|                  | <b>Skipped</b>  | <b>2</b>  |             |      |     |

Q12. The hospital administration actively regulated personnel distribution.

| Answer Choices   | Responses       |           |             |      |     |
|------------------|-----------------|-----------|-------------|------|-----|
| totally agree    | 26,00%          | 13        |             |      |     |
| rather agree     | 30,00%          | 15        |             |      |     |
| neutral          | 18,00%          | 9         |             |      |     |
| rather disagree  | 14,00%          | 7         |             |      |     |
| totally disagree | 12,00%          | 6         | total score | mean | SD  |
|                  | <b>Answered</b> | <b>50</b> | 172         | 3,4  | 1,3 |
|                  | <b>Skipped</b>  | <b>2</b>  |             |      |     |

Q13. There was financial compensation for the reallocation of staff from other departments.

| Answer Choices   | Responses       |           |             |      |     |
|------------------|-----------------|-----------|-------------|------|-----|
| totally agree    | 6,00%           | 3         |             |      |     |
| rather agree     | 8,00%           | 4         |             |      |     |
| neutral          | 34,00%          | 17        |             |      |     |
| rather disagree  | 26,00%          | 13        |             |      |     |
| totally disagree | 26,00%          | 13        | total score | mean | SD  |
|                  | <b>Answered</b> | <b>50</b> | 121         | 2,4  | 1,1 |
|                  | <b>Skipped</b>  | <b>2</b>  |             |      |     |

Q14. The hospital administration ensured sufficient protection of their employees.

| Answer Choices   | Responses |    |             |      |    |
|------------------|-----------|----|-------------|------|----|
| totally agree    | 22,00%    | 11 |             |      |    |
| rather agree     | 52,00%    | 26 |             |      |    |
| neutral          | 12,00%    | 6  |             |      |    |
| rather disagree  | 12,00%    | 6  |             |      |    |
| totally disagree | 2,00%     | 1  | total score | mean | SD |

|                 |           |     |     |   |
|-----------------|-----------|-----|-----|---|
| <b>Answered</b> | <b>50</b> | 190 | 3,8 | 1 |
| <b>Skipped</b>  | <b>2</b>  |     |     |   |

Q15. The hospital administration was perceived as a supporter of the orthopaedic and trauma surgery department.

| Answer Choices   | Responses       |           |             |      |     |
|------------------|-----------------|-----------|-------------|------|-----|
| totally agree    | 14,00%          | 7         |             |      |     |
| rather agree     | 16,00%          | 8         |             |      |     |
| neutral          | 32,00%          | 16        |             |      |     |
| rather disagree  | 28,00%          | 14        |             |      |     |
| totally disagree | 10,00%          | 5         | total score | mean | SD  |
|                  | <b>Answered</b> | <b>50</b> | 148         | 3    | 1,2 |
|                  | <b>Skipped</b>  | <b>2</b>  |             |      |     |

Q16. The orthopaedic and/or trauma surgery departments were actively included in crisis management.

| Answer Choices   | Responses       |           |             |      |     |
|------------------|-----------------|-----------|-------------|------|-----|
| totally agree    | 32,00%          | 16        |             |      |     |
| rather agree     | 30,00%          | 15        |             |      |     |
| neutral          | 18,00%          | 9         |             |      |     |
| rather disagree  | 12,00%          | 6         |             |      |     |
| totally disagree | 8,00%           | 4         | total score | mean | SD  |
|                  | <b>Answered</b> | <b>50</b> | 183         | 3,7  | 1,3 |
|                  | <b>Skipped</b>  | <b>2</b>  |             |      |     |

Q17. The orthopaedic and/or trauma surgery departments were included in the following crisis management groups:

|                 |           |                   |    |
|-----------------|-----------|-------------------|----|
| <b>Answered</b> | <b>50</b> | ICU               | 5  |
| <b>Skipped</b>  | <b>2</b>  | OR coordination   | 4  |
|                 |           | ED                | 4  |
|                 |           | COVID19 task forc | 24 |

**Free Text:**more than one answer possible (shown the most frequently mentioned)

Q18. Communication with anesthesiologists and intensive care physicians was adequate.

| Answer Choices  | Responses       |           |             |      |    |
|-----------------|-----------------|-----------|-------------|------|----|
| Stimme voll zu  | 46,94%          | 23        |             |      |    |
| Stimme eher zu  | 32,65%          | 16        |             |      |    |
| Neutral         | 12,24%          | 6         |             |      |    |
| Lehne eher ab   | 6,12%           | 3         |             |      |    |
| Lehne völlig ab | 2,04%           | 1         | total score | mean | SD |
|                 | <b>Answered</b> | <b>49</b> | 204         | 4,2  | 1  |
|                 | <b>Skipped</b>  | <b>3</b>  |             |      |    |

Q19. Communication with infectiologists was adequate.

| Answer Choices   | Responses       |           |             |      |    |
|------------------|-----------------|-----------|-------------|------|----|
| totally agree    | 34,69%          | 17        |             |      |    |
| rather agree     | 42,86%          | 21        |             |      |    |
| neutral          | 12,24%          | 6         |             |      |    |
| rather disagree  | 8,16%           | 4         |             |      |    |
| totally disagree | 2,04%           | 1         | total score | mean | SD |
|                  | <b>Answered</b> | <b>49</b> | 196         | 4    | 1  |
|                  | <b>Skipped</b>  | <b>3</b>  |             |      |    |



Q20. Estimate the capacity and its utilisation of patient beds in your department.

| Answer Choices | Responses | mean | SD |
|----------------|-----------|------|----|
|----------------|-----------|------|----|

Reduction of patient bed capacity in % 100,00% 43 45.3% 20,1  
 Q21. Estimate the capacity and its utilisation of operating rooms in your department.

| Answer Choices                            | Responses | mean      | SD   |
|-------------------------------------------|-----------|-----------|------|
| Reduction of operating room capacity in % | 100,00%   | 43 49.4%  | 20,4 |
| Utilisation of operating rooms in %       | 100,00%   | 43 61.6%  | 22   |
| <b>Answered</b>                           |           | <b>43</b> |      |
| <b>Skipped</b>                            |           | <b>9</b>  |      |

Q22. Estimate the capacity and its utilisation of the outpatient department in your department.

| Answer Choices                                   | Responses | mean      | SD   |
|--------------------------------------------------|-----------|-----------|------|
| Reduction of outpatient department capacity in % | 100,00%   | 43 72%    | 21,1 |
| Utilisation of outpatient department in %        | 97,67%    | 42 39,20% | 29,1 |
| <b>Answered</b>                                  |           | <b>43</b> |      |
| <b>Skipped</b>                                   |           | <b>9</b>  |      |

Q23. Estimate the fraction of doctors who were reallocated to other departments.

| Answered       | 43       | mean  | SD   |
|----------------|----------|-------|------|
| <b>Skipped</b> | <b>9</b> | 14.7% | 17,2 |

Q24. Which departments were those doctors allocated to? (free text, more than one answer possible)

|                 |           |          |    |
|-----------------|-----------|----------|----|
| <b>Answered</b> | <b>43</b> | ICU      | 19 |
| <b>Skipped</b>  | <b>9</b>  | ED       | 12 |
|                 |           | COVID-19 | 18 |

Q25. Estimate the fraction of doctors of your department with reduced working-hours.

| Answered       | 43       | mean  | SD   |
|----------------|----------|-------|------|
| <b>Skipped</b> | <b>9</b> | 5,70% | 12,1 |

Q26. Estimate the fraction of doctors of your department who have been infected by SARS-CoV-2.

| Answered       | 43       | mean | SD  |
|----------------|----------|------|-----|
| <b>Skipped</b> | <b>9</b> | 2.1% | 5,8 |

Q27. Estimate the fraction of doctors of your department who are/were in home quarantine.

| Answered       | 43       | mean | SD   |
|----------------|----------|------|------|
| <b>Skipped</b> | <b>9</b> | 8.6% | 10,4 |

Q28. Reduction of overtime hours was ordered.

| Answer Choices  | Responses |           |
|-----------------|-----------|-----------|
| Yes             | 74,42%    | 32        |
| No              | 25,58%    | 11        |
| <b>Answered</b> |           | <b>43</b> |
| <b>Skipped</b>  |           | <b>9</b>  |

Q29. Vacation was ordered.

Answer Choices

Responses

|     |        |   |
|-----|--------|---|
| Yes | 20,93% | 9 |
|-----|--------|---|

Q30. The wage agreement's legal requirements were met in doing so.

| Answer Choices | Responses       |           |
|----------------|-----------------|-----------|
| Yes            | 93,02%          | 40        |
| No             | 6,98%           | 3         |
|                | <b>Answered</b> | <b>43</b> |
|                | <b>Skipped</b>  | <b>9</b>  |

Q31. Sufficient adequate protective equipment was provided for your employees.

| Answer Choices | Responses |
|----------------|-----------|
|----------------|-----------|

|     |                 |           |
|-----|-----------------|-----------|
| Yes | 69,77%          | 30        |
| No  | 30,23%          | 13        |
|     | <b>Answered</b> | <b>43</b> |
|     | <b>Skipped</b>  | <b>9</b>  |

Q32. Emergency surgeries (at least N4 classified) had to be postponed due to sick leaves of employees.

| Answer Choices  | Responses |           |
|-----------------|-----------|-----------|
| Yes             | 2,33%     | 1         |
| No              | 97,67%    | 42        |
| <b>Answered</b> |           | <b>43</b> |
| <b>Skipped</b>  |           | <b>9</b>  |

Q33. Would you consider that not achieving your financial target settings will have financial consequences?

| Answer Choices  | Responses |           |
|-----------------|-----------|-----------|
| Yes             | 41,86%    | 18        |
| No              | 58,14%    | 25        |
| <b>Answered</b> |           | <b>43</b> |
| <b>Skipped</b>  |           | <b>9</b>  |

Q34. Would you consider that not achieving your financial target settings will have consequences department's staff?

| Answer Choices  | Responses |           |
|-----------------|-----------|-----------|
| Yes             | 34,88%    | 15        |
| No              | 65,12%    | 28        |
| <b>Answered</b> |           | <b>43</b> |
| <b>Skipped</b>  |           | <b>9</b>  |

Q35+36. Please estimate the loss regarding your financial target settings in the following aspects (in %) at this point.

| Answer Choices  | Responses | mean      | SD   |
|-----------------|-----------|-----------|------|
| Case Mix Points | 97,67%    | 42 29,3%  | 22,9 |
| Revenue         | 81,40%    | 35 29,3%  | 17,9 |
| <b>Answered</b> |           | <b>43</b> |      |
| <b>Skipped</b>  |           | <b>9</b>  |      |

Q37. The number of elective surgeries (e.g. arthroplasty) will decrease in the future.

| Answer Choices   | Responses |           |             |      |
|------------------|-----------|-----------|-------------|------|
| neutral          | 23,26%    | 10        |             |      |
| rather disagree  | 39,53%    | 17        |             |      |
| totally disagree | 11,63%    | 5         | total score | mean |
| <b>Answered</b>  |           | <b>43</b> | 115         | 2,7  |
| <b>Skipped</b>   |           | <b>9</b>  |             | 1,1  |

Q38. Your department will have lost significance in the future.

| Answer Choices   | Responses |    |             |      |
|------------------|-----------|----|-------------|------|
| totally agree    | 2,33%     | 1  |             |      |
| rather agree     | 6,98%     | 3  |             |      |
| neutral          | 18,60%    | 8  |             |      |
| rather disagree  | 41,86%    | 18 |             |      |
| totally disagree | 30,23%    | 13 | total score | mean |
|                  |           |    |             | SD   |

|                 |           |    |     |   |
|-----------------|-----------|----|-----|---|
| <b>Answered</b> | <b>43</b> | 90 | 2,1 | 1 |
| <b>Skipped</b>  | <b>9</b>  |    |     |   |

Q39. Overall, your department will be weakened by the SARS-CoV-2 pandemic.

| Answer Choices   | Responses       |           |             |      |     |
|------------------|-----------------|-----------|-------------|------|-----|
| totally agree    | 6,98%           | 3         |             |      |     |
| rather agree     | 20,93%          | 9         |             |      |     |
| neutral          | 27,91%          | 12        |             |      |     |
| rather disagree  | 25,58%          | 11        |             |      |     |
| totally disagree | 18,60%          | 8         | total score | mean | SD  |
|                  | <b>Answered</b> | <b>43</b> | 117         | 2,7  | 1,2 |
|                  | <b>Skipped</b>  | <b>9</b>  |             |      |     |

Q40. Participant in leading function of the department for

| Answer Choices                  | Responses       |           |
|---------------------------------|-----------------|-----------|
| Orthopaedics                    | 27,91%          | 12        |
| Trauma surgery                  | 18,60%          | 8         |
| Orthopaedics and trauma surgery | 53,49%          | 23        |
|                                 | <b>Answered</b> | <b>43</b> |
|                                 | <b>Skipped</b>  | <b>9</b>  |

Q41. The following field is provided for further comments

|                 |           |
|-----------------|-----------|
| <b>Answered</b> | <b>2</b>  |
| <b>Skipped</b>  | <b>50</b> |

Free Text: nothing relevant was answered
